# Supplementary material
Source: PubMed Central journal article supplement (PMC2877938)

## Supplemental Figures

### Supplemental Figure 1

**A.** Forced Myc expression increases total B cells in bone marrow of premalignant mice independently of the presence or absence of p73. Cells isolated from bone marrow (BM), spleen and lymph nodes (LN) of 4-week old non-transgenic (n= 8 per genotype) and premalignant E $\mu$ -myc mice (n= 8 per genotype) were stained with antibodies to B220 and CD19 and analyzed by FACS. Percentage of total B cells is indicated. Error bars represent the standard error.

**B.** Loss of p73 does not decrease apoptosis in premalignant cells but shows a trend towards increase. Spontaneous apoptosis of cells from total bone marrow of 4-week old non-transgenic (normal) and premalignant E $\mu$ -myc mice of the indicated genotypes (n=3 each).

**C.** Evidence for p53 activation upon p73 loss. Quantitative real time RT-PCR from bone marrow cells of non-transgenic mice (top) and early premalignant bone marrow cells of transgenic mice (bottom) of the indicated genotypes. Shown is the average gene expression of Puma, p21, Bax and Noxa from 3 mice pooled per genotype. Samples were run in duplicate and expression was normalized to HPRT.

### Supplemental Figure 2

Lymphomas of the indicated genotypes. No consistent morphologic difference is seen. H&E staining.

### Supplemental Figure 3

Loss of p73 alters the clinical phenotype of Myc-induced lymphomas, characterized by decreased tumor burden in lymphoid organs with concomitant higher dissemination to extranodal sites (see Supplemental Figure 4). Representative moribund E $\mu$ -myc p73<sup>+/+</sup> and p73<sup>-/-</sup> mice are shown.

**Supplemental Figure 4**

Histopathology of tumor dissemination in p73<sup>-/-</sup> E $\mu$ -myc mice. **Arrows denote lymphomatous infiltrates.** Top to bottom meninges, here the Dura Mater, massively thickened by tumor infiltration; brain parenchyma infiltrated via the Pia Mater; lungs with multiple tumor infiltrates from 2 different animals; macroscopically prominent, symmetric paravertebral “ridges” of lymphoma; these tumor masses completely efface paravertebral muscles and soft tissues; large lymphomatous nodule within calvarial muscle on skull; femur with replacement of bone marrow and dissemination into skeletal muscle and fat.

**Supplemental Figure 5**

SKY analysis of representative E $\mu$ -myc p73<sup>+/+</sup>, p73<sup>+/-</sup> and p73<sup>-/-</sup> lymphomas. The number of analyzed metaphases and the abnormalities found are summarized. p73-null lymphomas typically contain no gross chromosomal abnormalities (22 of 24 analyzed metaphases were normal) and display near-diploid DNA content.

**Supplemental Figure 6**

**A.** Validation of select deregulated genes relevant to tumor dissemination by quantitative real time RT-PCR. Shown is average gene expression of the indicated genes in premalignant B cells isolated from bone marrow of WT and p73<sup>-/-</sup>-E $\mu$ -myc mice (3 mice pooled per genotype, samples run in duplicate). Gene expression was normalized to HPRT expression.

**B.** Venn Diagrams that supplement Table 3 and illustrate overlap of deregulated genes between mouse and human lymphomas. Of 445 downregulated genes in disseminated mouse lymphomas, 35 genes (8%) are co-downregulated in all disseminated (extranodal) human lymphomas (left). Nine genes are co-upregulated in disseminated mouse and the subset of human lymphomas that share at least 50% of their upregulated gene list with mouse lymphomas (17%, 11 of 65 cases) (right).

**Supplemental Table 1.**

**Cell Surface Genes**

**A. 116 (31%) of the 377 genes that are upregulated in disseminated p73<sup>-/-</sup> EμMyc lymphomas versus p73<sup>+/+</sup> EμMyc controls are cell surface genes.**

Note: Specific genes can be assigned to more than one functional group.

| Gene symbol                                      | Systematic name | Description                                                                                           | Fold Change (log2) | P-Value  |
|--------------------------------------------------|-----------------|-------------------------------------------------------------------------------------------------------|--------------------|----------|
| <b>Major histocompatibility complex antigens</b> |                 |                                                                                                       |                    |          |
| H2-Eb1                                           | NM_010382       | histocompatibility 2, class II antigen E beta                                                         | 3.048096785        | 1.74E-07 |
| H2-Ea                                            | NM_010381       | histocompatibility 2, class II antigen E alpha                                                        | 2.606611874        | 5.32E-07 |
| Oas1f                                            | NM_145153       | 2'-5' oligoadenylate synthetase 1F                                                                    | 1.797958902        | 2.14E-06 |
| H2-Ab1                                           | NM_207105       | histocompatibility 2, class II antigen A, beta 1                                                      | 2.069209639        | 7.19E-07 |
| H2-Oa                                            | NM_008206       | histocompatibility 2, O region alpha locus                                                            | 1.662816749        | 1.37E-05 |
| Ms4a4b                                           | NM_021718       | membrane-spanning 4-domains, subfamily A, member 4B                                                   | 2.99920642         | 4.22E-07 |
| GpnmB                                            | NM_053110       | glycoprotein (transmembrane) nmb                                                                      | 1.587170566        | 4.15E-06 |
| Cybb                                             | NM_007807       | cytochrome b-245, beta polypeptide                                                                    | 1.19404708         | 4.05E-05 |
| Cd74                                             | NM_010545       | CD74 antigen (invariant polypeptide of major histocompatibility complex, class II antigen-associated) | 1.766104064        | 1.23E-06 |
| H2-DMA                                           | NM_010386       | histocompatibility 2, class II, locus DMA                                                             | 3.168134046        | 3.65E-08 |
| H2-DMb1                                          | NM_010387       | histocompatibility 2, class II, locus Mb1                                                             | 2.934639588        | 2.75E-08 |
| H2-DMb2                                          | NM_010388       | histocompatibility 2, class II, locus Mb2                                                             | 2.924278171        | 1.38E-07 |
| Lilrb3                                           | NM_011095       | leukocyte immunoglobulin-like receptor, subfamily B (with TM and ITIM domains), member 3              | 3.015291452        | 2.82E-08 |
| H2-Aa                                            | NM_010378       | histocompatibility 2, class II antigen A, alpha                                                       | 2.776006155        | 6.57E-08 |
| Cd83                                             | NM_009856       | CD83 antigen                                                                                          | 1.969812658        | 3.52E-06 |
| <b>Cell adhesion molecules</b>                   |                 |                                                                                                       |                    |          |
| Itgax                                            | NM_021334       | integrin alpha X                                                                                      | 1.189589482        | 2.75E-05 |
| Cd6                                              | NM_009852       | CD6 antigen, transcript variant 2                                                                     | 1.747161954        | 1.52E-06 |
| Cd8b1                                            | NM_009858       | CD8 antigen, beta chain 1                                                                             | 4.521213686        | 3.25E-09 |
| Itgal                                            | NM_008400       | integrin alpha L                                                                                      | 1.578690254        | 2.00E-05 |
| Ms4a1                                            | NM_007641       | membrane-spanning 4-domains, subfamily A, member 1                                                    | 2.776099575        | 9.00E-08 |
| Slc40a1                                          | NM_016917       | solute carrier family 40 (iron-regulated transporter), member 1                                       | 2.34217691         | 2.08E-07 |
| Postn                                            | NM_015784       | periostin, osteoblast specific factor                                                                 | 1.626648663        | 1.66E-06 |
| Tspan32                                          | NM_020286       | tetraspanin 32                                                                                        | 1.322546431        | 6.74E-06 |
| Cd9                                              | NM_007657       | CD9 antigen                                                                                           | 2.631739515        | 5.62E-08 |
| Armxc2                                           | NM_026139       | armadillo repeat containing, X-linked 2                                                               | 1.296326494        | 7.49E-06 |
| Cd34                                             | NM_133654       | CD34 antigen                                                                                          | 1.151022982        | 1.93E-05 |
| Col8a1                                           | NM_007739       | procollagen, type VIII, alpha 1                                                                       | 1.021631755        | 5.46E-05 |
| Cd2                                              | NM_013486       | CD2 antigen                                                                                           | 1.250522156        | 5.93E-05 |
| Itgb7                                            | NM_013566       | integrin beta 7                                                                                       | 3.361727127        | 1.08E-08 |
| Ifitm3                                           | NM_025378       | interferon induced transmembrane protein 3                                                            | 1.827734758        | 3.85E-05 |
| Sell                                             | NM_011346       | selectin, lymphocyte                                                                                  | 1.73181837         | 1.82E-06 |
| Cd244                                            | NM_018729       | CD244 natural killer cell receptor 2B4                                                                | 1.933225205        | 8.14E-07 |
| Amica1                                           | NM_001005421    | adhesion molecule, interacts with CXADR antigen 1                                                     | 1.187232414        | 4.02E-05 |
| Zyx                                              | NM_011777       | zyxin                                                                                                 | 2.654797692        | 7.37E-08 |
| Gpr137b                                          | NM_031999       | G protein-coupled receptor 137B                                                                       | 1.197694445        | 1.23E-05 |

**Chemokines**

|        |           |                                                     |             |          |
|--------|-----------|-----------------------------------------------------|-------------|----------|
| Cxcl4  | NM_019932 | chemokine (C-X-C motif) ligand 4                    | 1.32766983  | 5.35E-05 |
| Ccl5   | NM_013653 | chemokine (C-C motif) ligand 5                      | 2.30735947  | 2.10E-07 |
| Plek   | NM_019549 | pleckstrin                                          | 2.217609036 | 3.26E-07 |
| Ccl6   | NM_009139 | chemokine (C-C motif) ligand 6                      | 2.512559223 | 2.45E-07 |
| Ms4a4b | NM_021718 | membrane-spanning 4-domains, subfamily A, member 4B | 2.99920642  | 4.22E-07 |

**Cytokine and chemokine receptors**

|          |              |                                                                                     |             |             |
|----------|--------------|-------------------------------------------------------------------------------------|-------------|-------------|
| Csf2rb2  | NM_007781    | colony stimulating factor 2 receptor, beta 2, low-affinity (granulocyte-macrophage) | 1.499594383 | 1.17E-05    |
| Il27ra   | NM_016671    | interleukin 27 receptor, alpha                                                      | 1.500732887 | 7.49E-06    |
| Il18r1   | NM_008365    | interleukin 18 receptor 1                                                           | 1.032430758 | 4.71E-05    |
| Csf3r    | NM_007782    | colony stimulating factor 3 receptor (granulocyte)                                  | 1.073218776 | 1.80E-05    |
| Pglyrp2  | NM_021319    | peptidoglycan recognition protein 2                                                 | 2.071549444 | 0.001274368 |
| Tnfrsf18 | NM_009400    | tumor necrosis factor receptor superfamily, member 18, transcript variant 1         | 1.683384668 | 1.60E-06    |
| Ptpro    | NM_011216    | protein tyrosine phosphatase, receptor type, O                                      | 1.101393203 | 1.89E-05    |
| Lifr     | NM_013584    | leukemia inhibitory factor receptor                                                 | 1.169730543 | 4.67E-05    |
| Tnfrsf25 | NM_033042    | tumor necrosis factor receptor superfamily, member 25                               | 1.99666818  | 8.39E-07    |
| Bfsp2    | NM_001002896 | beaded filament structural protein 2, phakinin                                      | 1.030283126 | 5.80E-05    |
| Cd8b1    | NM_009858    | CD8 antigen, beta chain 1                                                           | 4.521213686 | 3.25E-09    |
| Ms4a7    | NM_027836    | membrane-spanning 4-domains, subfamily A, member 7, transcript variant 1            | 1.40356645  | 0.00011577  |
| Ms4a4b   | NM_021718    | membrane-spanning 4-domains, subfamily A, member 4B                                 | 2.99920642  | 4.22E-07    |
| Pglyrp2  | NM_021319    | peptidoglycan recognition protein 2                                                 | 2.071549444 | 0.001274368 |
| Ccr2     | NM_009915    | chemokine (C-C motif) receptor 2                                                    | 1.106851386 | 2.05E-05    |
| Ccr5     | NM_009917    | chemokine (C-C motif) receptor 5                                                    | 1.077494852 | 3.88E-05    |
| Ccr6     | NM_009835    | chemokine (C-C motif) receptor 6                                                    | 1.441494716 | 5.99E-06    |
| Cxcr3    | NM_009910    | chemokine (C-X-C motif) receptor 3                                                  | 1.159909187 | 7.83E-05    |
| Blr1     | NM_007551    | Burkitt lymphoma receptor 1, chemokine (C-X-C motif) receptor 5 (Cxcr5)             | 2.091135729 | 1.82E-06    |
| Cxcr6    | NM_03071]    | chemokine (C-X-C motif) receptor 6                                                  | 1.08243399  | 9.19E-05    |

**Interleukin receptors**

|         |           |                                                                                     |             |             |
|---------|-----------|-------------------------------------------------------------------------------------|-------------|-------------|
| Csf2rb2 | NM_007781 | colony stimulating factor 2 receptor, beta 2, low-affinity (granulocyte-macrophage) | 1.499594383 | 1.17E-05    |
| H2-Eb1  | NM_010382 | histocompatibility 2, class II antigen E beta                                       | 3.048096785 | 1.74E-07    |
| Itgax   | NM_021334 | integrin alpha X                                                                    | 1.189589482 | 2.75E-05    |
| Il27ra  | NM_016671 | interleukin 27 receptor, alpha                                                      | 1.500732887 | 7.49E-06    |
| Il18r1  | NM_008365 | interleukin 18 receptor 1                                                           | 1.032430758 | 4.71E-05    |
| Emr1    | NM_010130 | EGF-like module containing, mucin-like, hormone receptor-like sequence 1            | 2.290668939 | 3.47E-07    |
| Hebp1   | NM_013546 | heme binding protein 1                                                              | 1.176916145 | 8.14E-05    |
| Thy1    | NM_009382 | thymus cell antigen 1, theta                                                        | 3.87025413  | 4.46E-09    |
| Ptpro   | NM_011216 | protein tyrosine phosphatase, receptor type, O                                      | 1.101393203 | 1.89E-05    |
| Il2rb   | NM_008368 | interleukin 2 receptor, beta chain                                                  | 2.410063675 | 4.73E-07    |
| Lifr    | NM_013584 | leukemia inhibitory factor receptor                                                 | 1.169730543 | 4.67E-05    |
| Rtn4r11 | NM_177708 | reticulon 4 receptor-like 1                                                         | 1.435263308 | 0.000666608 |
| Il10ra  | NM_008348 | interleukin 10 receptor, alpha                                                      | 1.597845894 | 9.58E-06    |

**Receptors**

|        |           |                                                      |             |          |
|--------|-----------|------------------------------------------------------|-------------|----------|
| Celsr1 | NM_009886 | cadherin EGF LAG seven-pass G-type receptor 1        | 1.182998658 | 6.29E-05 |
| Fcgr1g | NM_010185 | Fc receptor, IgE, high affinity I, gamma polypeptide | 1.710038492 | 2.00E-06 |
| Ms4a4c | NM_029499 | membrane-spanning 4-domains, subfamily A, member 4C  | 1.88334911  | 6.04E-07 |
| Marco  | NM_010766 | macrophage receptor with collagenous structure       | 1.738611882 | 1.03E-06 |

|          |           |                                                                                          |             |             |
|----------|-----------|------------------------------------------------------------------------------------------|-------------|-------------|
| Fcgr1    | NM_010186 | Fc receptor, IgG, high affinity I                                                        | 1.649505287 | 1.69E-06    |
| Rtn4r11  | NM_177708 | reticulin 4 receptor-like 1                                                              | 1.435263308 | 0.000666608 |
| Gprc5b   | NM_022420 | G protein-coupled receptor, family C, group 5, member B                                  | 2.608787576 | 1.36E-07    |
| Cd300d   | NM_134158 | Cd300D antigen                                                                           | 1.429497385 | 6.78E-06    |
| Cd6      | NM_009852 | CD6 antigen (Cd6), transcript variant 2                                                  | 1.747161954 | 1.52E-06    |
| Derl3    | NM_024440 | Der1-like domain family, member 3                                                        | 1.147471174 | 0.000255925 |
| Ltbr     | NM_010736 | lymphotoxin B receptor                                                                   | 1.11518916  | 3.49E-05    |
| Cd3g     | NM_009850 | CD3 antigen, gamma polypeptide                                                           | 2.574810437 | 2.23E-07    |
| Cd3d     | NM_013487 | CD3 antigen, delta polypeptide                                                           | 3.167400834 | 2.40E-07    |
| Emr1     | NM_010130 | EGF-like module containing, mucin-like, hormone receptor-like sequence 1                 | 2.290668939 | 3.47E-07    |
| Csf3r    | NM_007782 | colony stimulating factor 3 receptor (granulocyte)                                       | 1.073218776 | 1.80E-05    |
| Tbxa2r   | NM_009325 | thromboxane A2 receptor                                                                  | 1.192887345 | 0.000724995 |
| Cd36     | NM_007643 | CD36 antigen                                                                             | 1.20768995  | 1.03E-05    |
| Cd244    | NM_018729 | CD244 natural killer cell receptor 2B4                                                   | 1.933225205 | 8.14E-07    |
| Clec4b1  | NM_027218 | C-type lectin domain family 4, member b1                                                 | 1.742032903 | 2.06E-06    |
| Ltb4r1   | NM_008519 | leukotriene B4 receptor 1                                                                | 1.240414074 | 2.12E-05    |
| Ms4a6b   | NM_027209 | membrane-spanning 4-domains, subfamily A, member 6B                                      | 2.816733097 | 3.80E-08    |
| Lilrb3   | NM_011095 | leukocyte immunoglobulin-like receptor, subfamily B (with TM and ITIM domains), member 3 | 3.015291452 | 2.82E-08    |
| Pglyrp1  | NM_009402 | peptidoglycan recognition protein 1                                                      | 1.342177318 | 7.56E-05    |
| Cd93     | NM_010740 | CD93 antigen                                                                             | 2.404399156 | 2.49E-07    |
| Cd2      | NM_013486 | CD2 antigen                                                                              | 1.250522156 | 5.93E-05    |
| Ms4a4d   | NM_025658 | membrane-spanning 4-domains, subfamily A, member 4D                                      | 1.089828744 | 4.39E-05    |
| Olfm1    | NM_019498 | olfactomedin 1, transcript variant 1                                                     | 1.134089324 | 2.19E-05    |
| Cd8b1    | NM_009858 | CD8 antigen, beta chain 1                                                                | 4.521213686 | 3.25E-09    |
| Plaur    | NM_011113 | plasminogen activator, urokinase receptor                                                | 1.545711182 | 6.44E-06    |
| Gpr146   | NM_030258 | G protein-coupled receptor 146, transcript variant 1                                     | 1.067660721 | 3.68E-05    |
| Islr2    | NM_177193 | immunoglobulin superfamily containing leucine-rich repeat 2                              | 1.3272204   | 4.30E-05    |
| Antxr1   | NM_054041 | anthrax toxin receptor 1                                                                 | 1.760843385 | 6.25E-06    |
| Lrp12    | NM_172814 | low density lipoprotein-related protein 12                                               | 1.196149378 | 9.88E-06    |
| Ebi2     | NM_183031 | Epstein-Barr virus induced gene 2                                                        | 1.482759275 | 2.11E-05    |
| Tlr1     | NM_030682 | toll-like receptor 1                                                                     | 1.075847613 | 1.70E-05    |
| Ptpro    | NM_011216 | protein tyrosine phosphatase, receptor type, O                                           | 1.101393203 | 1.89E-05    |
| Clec2d   | NM_053109 | C-type lectin domain family 2, member d                                                  | 1.839022302 | 2.69E-06    |
| Tnfrsf25 | NM_033042 | tumor necrosis factor receptor superfamily, member 25                                    | 1.99666818  | 8.39E-07    |
| Csf2rb2  | NM_007781 | colony stimulating factor 2 receptor, beta 2, low-affinity (granulocyte-macrophage)      | 1.499594383 | 1.17E-05    |
| Cd5      | NM_007650 | CD5 antigen                                                                              | 2.555166265 | 1.39E-07    |
| Ms4a1    | NM_007641 | membrane-spanning 4-domains, subfamily A, member 1                                       | 2.776099575 | 9.00E-08    |
| Trem2    | NM_031254 | triggering receptor expressed on myeloid cells 2                                         | 2.698199122 | 1.28E-07    |
| P2ry6    | NM_183168 | pyrimidinergic receptor P2Y, G-protein coupled, 6                                        | 1.546539672 | 3.82E-06    |
| Apob48r  | NM_138310 | apolipoprotein B48 receptor                                                              | 1.133520728 | 2.57E-05    |
| Lgals3bp | NM_011150 | lectin, galactoside-binding, soluble, 3 binding protein                                  | 3.062110407 | 2.79E-08    |
| Tnfrsf18 | NM_009400 | tumor necrosis factor receptor superfamily, member 18, transcript variant 1              | 1.683384668 | 1.60E-06    |
| Cd300lf  | NM_145634 | CD300 antigen like family member F                                                       | 1.350391436 | 1.63E-05    |
| Mgl1     | NM_010796 | macrophage galactose N-acetyl-galactosamine specific lectin 1                            | 2.682042334 | 1.73E-07    |
| Cd3g     | NM_009850 | CD3 antigen, gamma polypeptide                                                           | 2.574810437 | 2.23E-07    |
| Pira3    | NM_011090 | paired-Ig-like receptor A3                                                               | 1.818038831 | 9.98E-07    |

**Other receptors**

|          |           |                                                               |             |             |
|----------|-----------|---------------------------------------------------------------|-------------|-------------|
| Plaur    | NM_011113 | plasminogen activator, urokinase receptor                     | 1.545711182 | 6.44E-06    |
| Sid1     | NM_198034 | SID1 transmembrane family, member 1                           | 1.025413023 | 3.43E-05    |
| Celsr1   | NM_009886 | cadherin EGF LAG seven-pass G-type receptor 1                 | 1.182998658 | 6.29E-05    |
| Pglyrp2  | NM_021319 | peptidoglycan recognition protein 2                           | 2.071549444 | 0.001274368 |
| Antxr1   | NM_054041 | anthrax toxin receptor 1                                      | 1.760843385 | 6.25E-06    |
| Marco    | NM_010766 | macrophage receptor with collagenous structure                | 1.738611882 | 1.03E-06    |
| Clec2d   | NM_053109 | C-type lectin domain family 2, member d                       | 1.839022302 | 2.69E-06    |
| Retnlg   | NM_181596 | resistin like gamma                                           | 1.799267204 | 4.53E-05    |
| Cd96     | NM_032465 | CD96 antigen                                                  | 1.196468788 | 2.97E-05    |
| Sparc    | NM_009242 | secreted acidic cysteine rich glycoprotein                    | 1.835381724 | 2.41E-06    |
| Cd5      | NM_007650 | CD5 antigen                                                   | 2.555166265 | 1.39E-07    |
| Cd6      | NM_009852 | CD6 antigen, transcript variant 2                             | 1.747161954 | 1.52E-06    |
| Ms4a1    | NM_007641 | membrane-spanning 4-domains, subfamily A, member 1            | 2.776099575 | 9.00E-08    |
| Cd3d     | NM_013487 | CD3 antigen, delta polypeptide                                | 3.167400834 | 2.40E-07    |
| Ltbr     | NM_010736 | lymphotoxin B receptor                                        | 1.11518916  | 3.49E-05    |
| Lgals3bp | NM_011150 | lectin, galactoside-binding, soluble, 3 binding protein       | 3.062110407 | 2.79E-08    |
| Cd36     | NM_007643 | CD36 antigen                                                  | 1.20768995  | 1.03E-05    |
| Clec4b1  | NM_027218 | C-type lectin domain family 4, member b1                      | 1.742032903 | 2.06E-06    |
| Samsn1   | NM_023380 | SAM domain, SH3 domain and nuclear localization signals, 1    | 1.156622628 | 0.000122193 |
| Marcks   | NM_008538 | myristoylated alanine rich protein kinase C substrate         | 1.096768258 | 3.87E-05    |
| Cd93     | NM_010740 | CD93 antigen                                                  | 2.404399156 | 2.49E-07    |
| Mgl1     | NM_010796 | macrophage galactose N-acetyl-galactosamine specific lectin 1 | 2.682042334 | 1.73E-07    |
| Cd3g     | NM_009850 | CD3 antigen, gamma polypeptide                                | 2.574810437 | 2.23E-07    |
| Cd55     | NM_010016 | CD55 antigen                                                  | 1.964477252 | 3.66E-06    |
| Cd68     | NM_009853 | CD68 antigen                                                  | 1.193065414 | 0.000163866 |
| Cd52     | NM_013706 | CD52 antigen                                                  | 2.590008998 | 1.00E-05    |

**Other cytokines**

|        |           |                                                    |             |             |
|--------|-----------|----------------------------------------------------|-------------|-------------|
| Ebi2   | NM_183031 | Epstein-Barr virus induced gene 2                  | 1.482759275 | 2.11E-05    |
| Cd96   | NM_032465 | CD96 antigen                                       | 1.196468788 | 2.97E-05    |
| Cd2    | NM_013486 | CD2 antigen                                        | 1.250522156 | 5.93E-05    |
| Csf3r  | NM_007782 | colony stimulating factor 3 receptor (granulocyte) | 1.073218776 | 1.80E-05    |
| Ltb    | NM_008518 | lymphotoxin B                                      | 5.958287724 | 4.08E-10    |
| Tbxa2r | NM_009325 | thromboxane A2 receptor                            | 1.192887345 | 0.000724995 |
| Clmn   | NM_053155 | calmin, transcript variant 1                       | 1.716848208 | 4.36E-06    |
| Igfbp7 | NM_008048 | insulin-like growth factor binding protein 7       | 2.179429829 | 2.10E-07    |

**Extracellular matrix glycoproteins**

|        |           |                                                     |             |          |
|--------|-----------|-----------------------------------------------------|-------------|----------|
| Cd5    | NM_007650 | CD5 antigen                                         | 2.555166265 | 1.39E-07 |
| H2-Ab1 | NM_207105 | histocompatibility 2, class II antigen A, beta 1    | 2.069209639 | 7.19E-07 |
| Nid1   | NM_010917 | nidogen 1                                           | 3.209967968 | 4.50E-08 |
| Ms4a4b | NM_021718 | membrane-spanning 4-domains, subfamily A, member 4B | 2.99920642  | 4.22E-07 |
| Sspn   | NM_010656 | sarcospan                                           | 1.57790458  | 2.65E-06 |
| GpnmB  | NM_053110 | glycoprotein (transmembrane) nmb                    | 1.587170566 | 4.15E-06 |
| Cd244  | NM_018729 | CD244 natural killer cell receptor 2B4              | 1.933225205 | 8.14E-07 |
| Cmtm3  | NM_024217 | CKLF-like MARVEL transmembrane domain containing 3  | 1.101322457 | 2.63E-05 |
| Lilrb3 | NM_011095 | leukocyte immunoglobulin-like receptor, subfamily B | 3.015291452 | 2.82E-08 |

|         |           |                                                         |             |          |
|---------|-----------|---------------------------------------------------------|-------------|----------|
| Nfam1   | NM_028728 | (with TM and ITIM domains), member 3                    | 1.304924986 | 2.66E-05 |
| Emilin2 | NM_145158 | Nfat activating molecule with ITAM motif 1              | 2.680020423 | 4.84E-08 |
| Clec2d  | NM_053109 | elastin microfibril interfacier 2                       | 1.839022302 | 2.69E-06 |
| Il4i1   | NM_010215 | C-type lectin domain family 2, member d                 | 1.425045265 | 1.68E-05 |
| Gprc5b  | NM_022420 | interleukin 4 induced 1                                 | 2.608787576 | 1.36E-07 |
| H2-Aa   | NM_010378 | G protein-coupled receptor, family C, group 5, member B | 2.776006155 | 6.57E-08 |
|         |           | histocompatibility 2, class II antigen A, alpha         |             |          |

**B. 67 (15%) of the 445 genes that are downregulated in disseminated p73<sup>-/-</sup> EμMyc lymphomas versus p73<sup>+/+</sup> EμMyc controls are cell surface genes.**

**Extracellular matrix**

|         |           |                                                              |              |             |
|---------|-----------|--------------------------------------------------------------|--------------|-------------|
| Lamc1   | NM_010683 | laminin, gamma 1                                             | -1.762911501 | 1.72E-06    |
| Amigo1  | NM_146137 | adhesion molecule with Ig like domain 1                      | -1.160789815 | 3.29E-05    |
| Ltbp2   | NM_013589 | latent transforming growth factor beta binding protein 2     | -1.490902118 | 5.71E-06    |
| Lrig3   | NM_177152 | leucine-rich repeats and immunoglobulin-like domains 3       | -1.077894902 | 2.65E-05    |
| Lrig1   | NM_008377 | leucine-rich repeats and immunoglobulin-like domains 1       | -2.094950235 | 1.61E-06    |
| Podxl   | NM_013723 | podocalyxin-like                                             | -1.680329549 | 1.27E-06    |
| Nyx     | NM_173415 | nyctalopin                                                   | -1.343258489 | 5.91E-06    |
| Flrt3   | NM_178382 | fibronectin leucine rich transmembrane protein 3             | -1.985457176 | 5.16E-07    |
| Itgb5   | NM_010580 | integrin beta 5                                              | -1.225925633 | 2.40E-05    |
| Mmp11   | NM_008606 | matrix metalloproteinase 11                                  | -1.05819589  | 3.70E-05    |
| Col18a1 | NM_009929 | procollagen, type XVIII, alpha 1                             | -1.518685905 | 2.74E-06    |
| Angptl4 | NM_020581 | angiopoietin-like 4                                          | -1.07105166  | 2.79E-05    |
| Sdc4    | NM_011521 | syndecan 4                                                   | -1.236897527 | 0.000683667 |
| Ttc3    | NM_009441 | tetratricopeptide repeat domain 3                            | -1.036396687 | 4.46E-05    |
| Dusp14  | NM_019819 | dual specificity phosphatase 14                              | -1.089521308 | 4.01E-05    |
| Gpr12   | NM_008151 | G-protein coupled receptor 12, transcript variant 2          | -1.879313852 | 7.27E-07    |
| Mela    | NM_008581 | melanoma antigen                                             | -9.397078644 | 2.21E-11    |
| Tmem100 | NM_026433 | transmembrane protein 100                                    | -1.352173272 | 5.69E-06    |
| Adam15  | NM_009614 | a disintegrin and metalloproteinase domain 15 (metargidin)   | -1.960477819 | 5.94E-07    |
| Adam9   | NM_007404 | a disintegrin and metalloproteinase domain 9 (meltrin gamma) | -1.021647796 | 2.37E-05    |

**Cell adhesion molecules**

|        |              |                                                          |              |             |
|--------|--------------|----------------------------------------------------------|--------------|-------------|
| Ltbp2  | NM_013589    | latent transforming growth factor beta binding protein 2 | -1.490902118 | 5.71E-06    |
| Pcdh17 | NM_001013753 | protocadherin 17                                         | -4.075342385 | 5.23E-08    |
| Itgb5  | NM_010580    | integrin beta 5                                          | -1.225925633 | 2.40E-05    |
| Mpzl1  | NM_001001880 | myelin protein zero-like 1                               | -2.393867446 | 5.50E-07    |
| Eva1   | NM_007962    | epithelial V-like antigen 1                              | -4.446673022 | 4.45E-09    |
| F11r   | NM_172647    | F11 receptor                                             | -1.192540632 | 1.77E-05    |
| Ssx2ip | NM_138744    | synovial sarcoma, X breakpoint 2 interacting protein     | -1.160277675 | 3.58E-05    |
| Tspan5 | NM_019571    | tetraspanin 5                                            | -1.268586128 | 0.000120439 |
| Sdc4   | NM_011521    | syndecan 4                                               | -1.236897527 | 0.000683667 |
| Tspan3 | NM_019793    | tetraspanin 3                                            | -1.194873209 | 1.58E-05    |

**Cell junction protein**

|        |              |                                                                      |              |             |
|--------|--------------|----------------------------------------------------------------------|--------------|-------------|
| Cldn10 | NM_021386    | claudin 10                                                           | -1.064267249 | 4.77E-05    |
| Cask   | NM_009806    | calcium/calmodulin-dependent serine protein kinase (MAGUK family)    | -1.272262663 | 7.39E-06    |
| Inadl  | NM_001005787 | InaD-like (Drosophila)                                               | -1.027891273 | 0.001596061 |
| Pkp2   | NM_026163    | plakophilin 2                                                        | -1.354075309 | 6.43E-06    |
| Magi1  | NM_010367    | membrane associated guanylate kinase, WW and PDZ domain containing 1 | -3.345664488 | 1.97E-08    |

**Ligands**

|       |           |                                                  |              |          |
|-------|-----------|--------------------------------------------------|--------------|----------|
| Ccl25 | NM_009138 | chemokine (C-C motif) ligand 25                  | -1.953769216 | 5.39E-07 |
| Tgfb2 | NM_009367 | transforming growth factor, beta 2               | -1.612745454 | 2.51E-06 |
| Gdf1  | NM_008107 | growth differentiation factor 1                  | -1.502319504 | 1.19E-05 |
| Vegfc | NM_009506 | vascular endothelial growth factor C             | -1.806111463 | 1.00E-06 |
| Tgfb3 | NM_009368 | transforming growth factor, beta 3               | -2.713145302 | 8.78E-08 |
| Abtb2 | NM_178890 | ankyrin repeat and BTB (POZ) domain containing 2 | -1.498161247 | 2.30E-06 |
| Jag2  | NM_010588 | jagged 2                                         | -1.611450798 | 3.69E-06 |
| Jag1  | NM_013822 | jagged 1                                         | -1.672420266 | 2.49E-06 |

**Receptors**

|        |              |                                                          |              |          |
|--------|--------------|----------------------------------------------------------|--------------|----------|
| Klra7  | NM_014194    | killer cell lectin-like receptor, subfamily A, member 7  | -3.880559807 | 4.38E-09 |
| Klra16 | NM_013794    | killer cell lectin-like receptor, subfamily A, member 16 | -3.386790284 | 5.03E-08 |
| Igf1r  | NM_010513    | insulin-like growth factor I receptor                    | -1.584298157 | 8.12E-06 |
| Il20rb | NM_001033543 | interleukin 20 receptor beta                             | -1.122137979 | 2.43E-05 |
| Il15ra | NM_008358    | interleukin 15 receptor, alpha chain                     | -1.331453676 | 2.51E-05 |
| Acvr2b | NM_007397    | activin receptor IIB                                     | -1.145729206 | 3.01E-05 |
| Ldlr   | NM_010700    | low density lipoprotein receptor                         | -1.42121622  | 3.34E-06 |
| Crif1  | NM_018827    | cytokine receptor-like factor 1                          | -1.266053875 | 8.99E-06 |
| Celsr2 | NM_017392    | cadherin EGF LAG seven-pass G-type receptor 2            | -1.037866921 | 2.35E-05 |
| Slamf7 | NM_144539    | SLAM family member 7                                     | -1.123436952 | 5.73E-05 |
| Slamf9 | NM_029612    | SLAM family member 9                                     | -1.202603746 | 1.06E-05 |
| Fgfr1  | NM_054071    | fibroblast growth factor receptor-like 1                 | -1.398936259 | 3.74E-05 |

**Other receptors**

|         |           |                                                                             |              |          |
|---------|-----------|-----------------------------------------------------------------------------|--------------|----------|
| Olf1153 | NM_146640 | olfactory receptor 1153                                                     | -1.147131038 | 3.09E-05 |
| Gfra1   | NM_010279 | glial cell line derived neurotrophic factor family receptor alpha 1 (Gfra1) | -1.69674776  | 1.64E-06 |
| F11r    | NM_172647 | F11 receptor                                                                | -1.192540632 | 1.77E-05 |
| Acvr2b  | NM_007397 | activin receptor IIB                                                        | -1.145729206 | 3.01E-05 |
| Ptprs   | NM_011218 | protein tyrosine phosphatase, receptor type, S                              | -1.176724131 | 5.38E-05 |
| Thbd    | NM_009378 | thrombomodulin                                                              | -1.047621976 | 3.48E-05 |
| Agrin   | NM_021604 | agrin                                                                       | -2.474377652 | 1.74E-07 |
| Itn2a   | NM_008409 | integral membrane protein 2A                                                | -1.057086066 | 4.57E-05 |
| Ryk     | NM_013649 | receptor-like tyrosine kinase                                               | -1.025177632 | 4.44E-05 |

**Other**

|         |              |                                                                          |              |          |
|---------|--------------|--------------------------------------------------------------------------|--------------|----------|
| St3gal5 | NM_011375    | ST3 beta-galactoside alpha-2,3-sialyltransferase 5, transcript variant 2 | -1.137483768 | 1.96E-05 |
| Ankrd6  | NM_001012450 | ankyrin repeat domain 6, transcript variant 1                            | -4.218163385 | 5.45E-09 |
| St7     | NM_022332    | Suppression of tumorigenicity 7                                          | -1.070185772 | 2.62E-05 |
| Ssfa2   | NM_080558    | sperm specific antigen 2                                                 | -1.033026393 | 3.70E-05 |
| Nck2    | NM_010879    | non-catalytic region of tyrosine kinase adaptor protein 2                | -1.138088281 | 1.46E-05 |



|        |              |                            |              |          |
|--------|--------------|----------------------------|--------------|----------|
| Mpz1   | NM_001001880 | myelin protein zero-like 1 | -2.393867446 | 5.50E-07 |
| Vpreb2 | NM_016983    | pre-B lymphocyte gene 2    | -1.580324941 | 1.46E-06 |
| Vpreb1 | NM_016982    | pre-B lymphocyte gene 1    | -3.393178138 | 1.06E-08 |

## Supplemental Table 2.

Primer sequences used for quantitative real time RT-PCR in this paper:

HPRT FW-GGCTATAAGTTCTTTGCTGACC  
HPRT RV-CTCCACCAATAACTTTTATGTCC

Aid FW-CGTGGTGAAGAGGAGAGATAGTG  
Aid Rv-CAGTCTGAGATGTAGCGTAGGAA

Arf FW-CTTGGTCACTGTGAGGATTCA  
Arf RV-CTACGTGAACGTTGCCCATCA

p53 FW- ACAGCGTGGTGGTACCTTAT  
p53 RV-GGTTCCCACTGGAGTCTTC

Mdm2 FW-CAGTAGCAGCAGCAGCAGCGA  
Mdm2 RV-GCCCTTCGTCACTCAGGCTGT

p21 FW-AGCAAAGTGTCCGTTGTCT  
p21 RV-AGAAATCTGTCAGGCTGGTC

Bax FW-CTGAGCTGACCTTGGAGC  
Bax RV-GACTCCAGCCACAAAGATG

Noxa FW-CGTCCGAACGCGCCAGTGAACCC  
Noxa RV-TCCTTCTGGGAGGTCCCTTCTTGC

Puma FW-ATGGCCCGCGCACGCCAGG  
Puma RV-CCGCCGCTCGTACTGCGGTTG

Ccr2 FW-AACAGTGCCCAAGTTTTCTATAGG  
Ccr2 RV-CGAGACCTCTTGCTCCCA

Cxcr3 FW-TGCTAGATGCCTCGGACTTT  
Cxcr3 RV-CGCTGACTCAGTAGCACAG

Cxcr5 FW-ACTCCTTACCACAGTGCACCTT  
Cxcr5 RV-GGAAACGGGAGGTGAACCA

Cxcr6 FW-ATGTTTGCCCCAACAGATG  
Cxcr6 RV-CTACAATTGGAACATACTGGTGG

Itgal FW- CCAGACTTTTGCTACTGGGAC  
Itgal RV- GCTTGTTCCGGCAGTGATAGAG

Itgb7 FW-ACCTGAGCTACTCAATGAAGGA  
Itgb7 RV-CACCGTTTTGTCCACGAAGG

Sell FW-TACATTGCCAAAAGCCCTTAT  
Sell RV-CATCGTTCCATTTCCAGAGTC

Ccr5 FW-TTTTCAAGGGTCAGTTCCGAC  
Ccr5 RV-GGAAGACCATCATGTTACCCAC

Ccr6 FW-CCTGGGCAACATTATGGTGGT  
Ccr6 RV-CAGAACGGTAGGGTGAGGACA

Ccl5 FW-GCTGCTTTGCCTACCTCTCC  
Ccl5 RV-TCGAGTGACAAACAGACTGC

Ccl6 FW-GCTGGCCTCATAAAGAAATGG  
Ccl6 RV-GCTTAGGCACCTCTGAACTCTC

Il18r1 FW-ACTTTTGCTGTGGAGACGTTAC  
Il18r1 RV-CCGGCTTTTCTCTATCAGTGAAT

Il27ra FW-CTCCTGGGAACCTTTGGGC  
Il27ra RV-CGTCCCTTTTGTGTCCCC

Thy1 FW-TGCTCTCAGTCTTGCAGGTG  
Thy1 RV- TGGATGGAGTTATCCTTGGTGTT

VpreB1 FW-GCTGCTGGCCTATCTCACAG  
VpreB1 RV-CCAATGTTATGGTCGTTGCTCA

Ryk FW-GGTCTTGATGCAGAGCTTTACT  
Ryk RV-CCCATAGCCACAAAGTTGTCTAC

Thbd FW- CTCTCCGCACTAGCCAAGC  
Thbd RV- GGAGCGCACTGTCATCAAATG

Ankrd6 FW-GTCGCTGCGCTTTCAGAAC  
Ankrd6 RV-CTTGGTAACGGCTACCTTGGC

Sl7 FW-AGGAACCCTCAAGCCAGGATT  
Sl7 RV-GGTAGAGGAAGCAATTAGGGGA

Itm2a FW-AGGCGCGGCAAGATATAGAG  
Itm2a RV-GTCCTGCCAAGATGAATGAGAG

Zyx FW-CAGGGAGAAAGTGTGCAGTATT  
Zyx RV-TCGTTCTTGGTCATGTCGTCC

Ifitm3 FW-CCCCAAACTACGAAAGAATCA  
Ifitm3 RV-ACCATCTTCCGATCCCTAGAC

Csf3r FW-CTGATCTTCTTGCTACTCCCCA  
Csf3r RV-GGTGTAGTTCAAGTGAGGCAG

Relative expression of the target genes was calculated using the  $\Delta CT$  method described previously: Relative expression =  $2^{-\Delta CT}$ , where  $\Delta CT = CT (\text{Target gene}) - CT (\text{HPRT})$ .

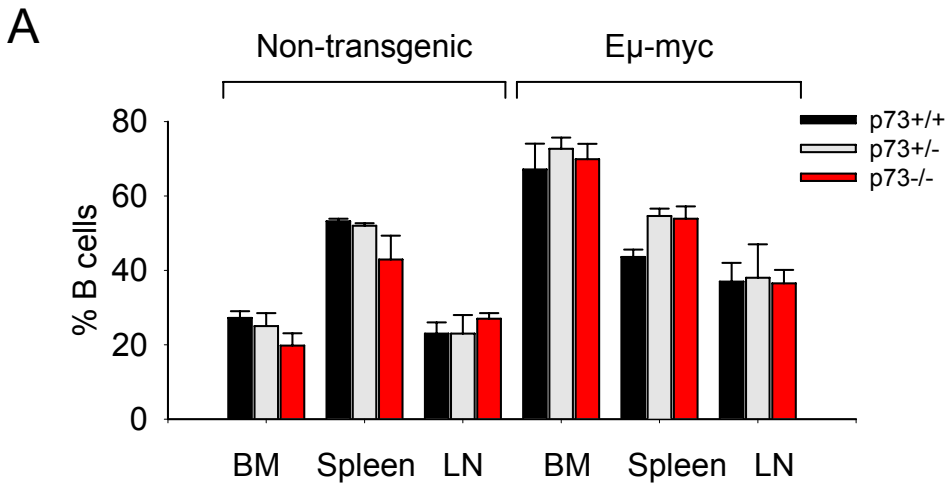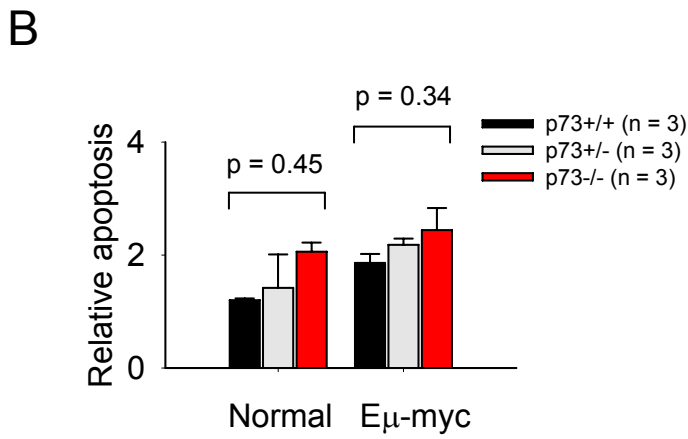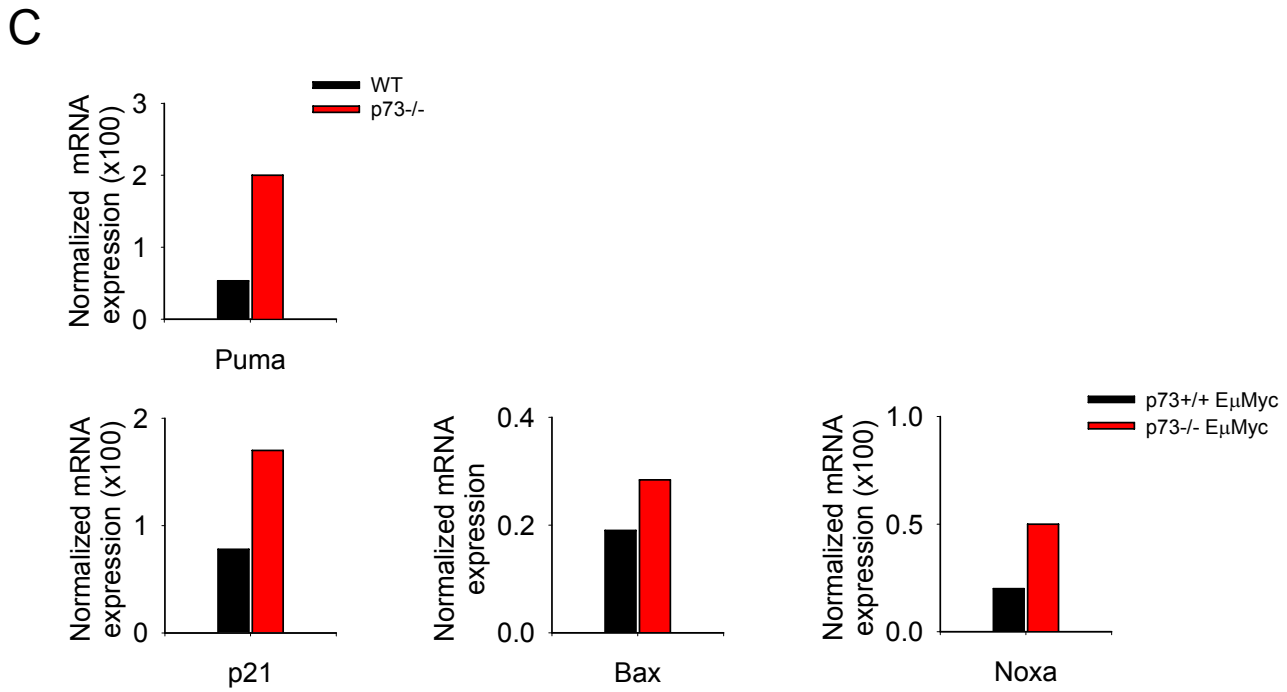

Lymph nodes: 10x

Lymph nodes: 40x

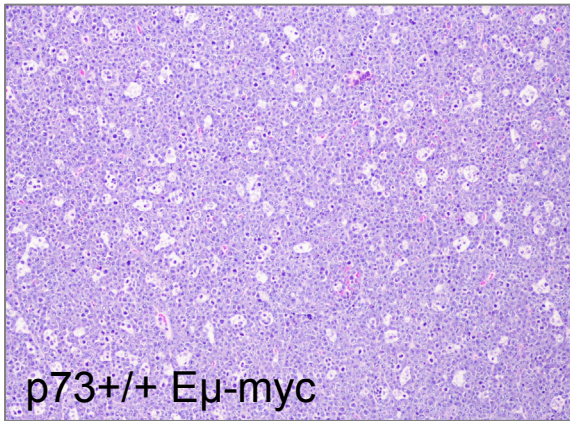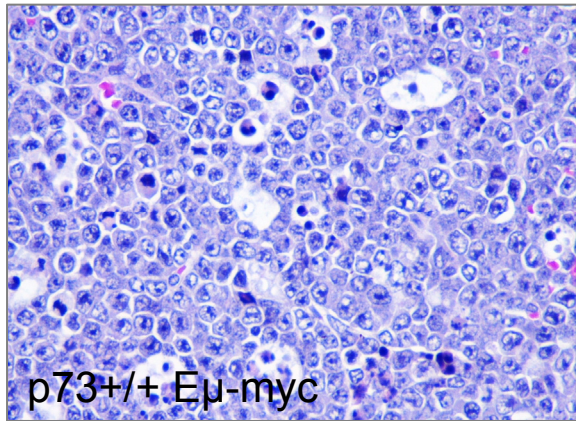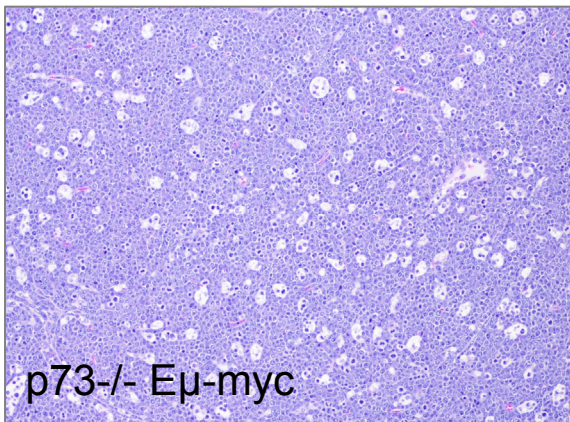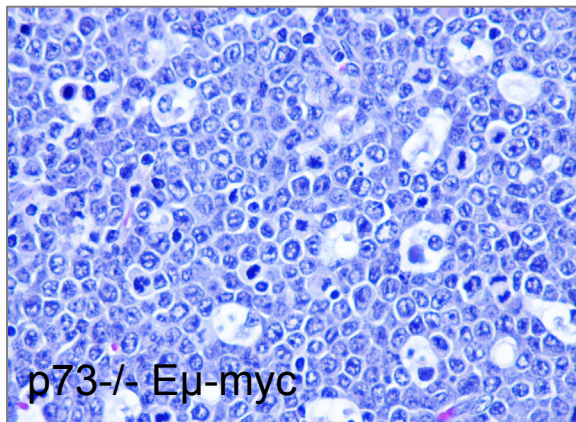

p73<sup>+/+</sup> E $\mu$ -myc

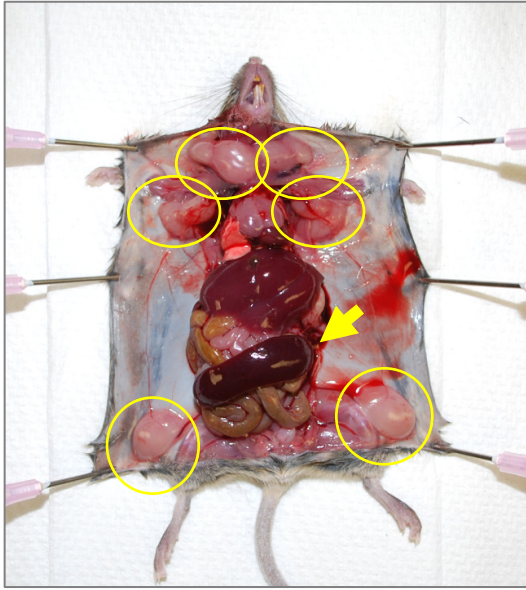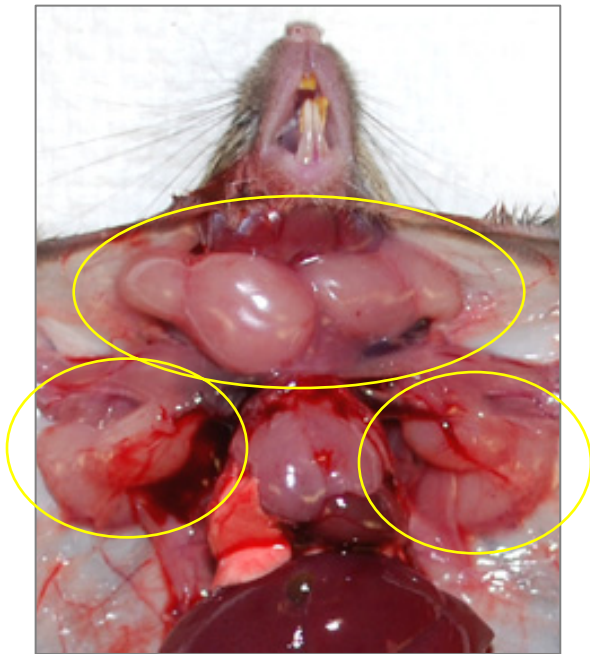

p73<sup>-/-</sup> E $\mu$ -myc

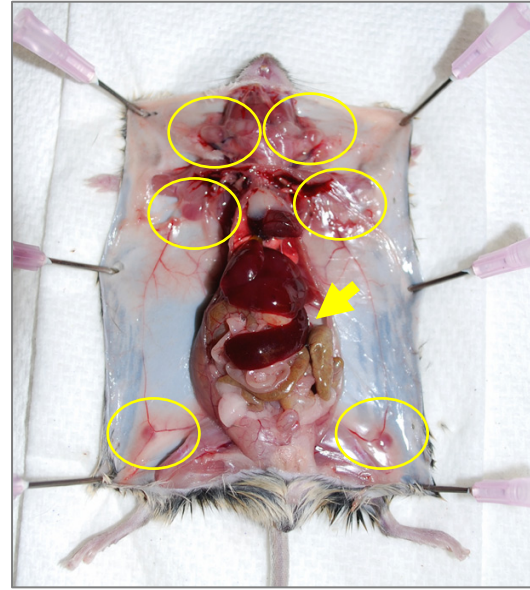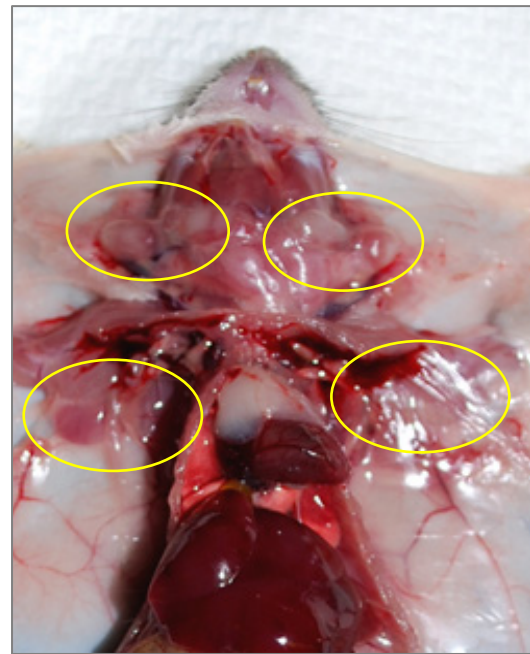

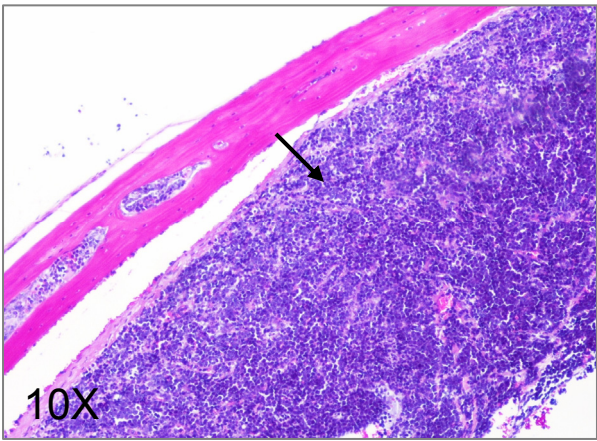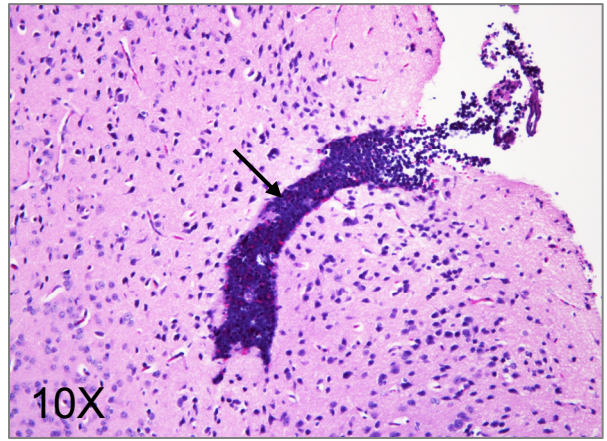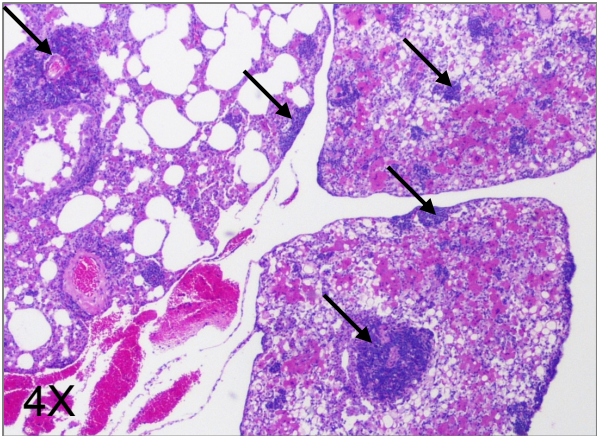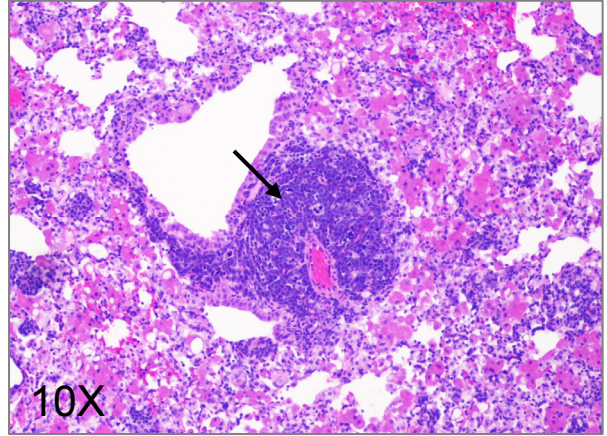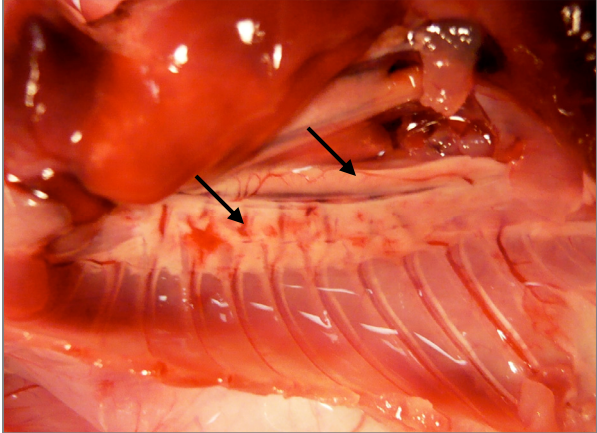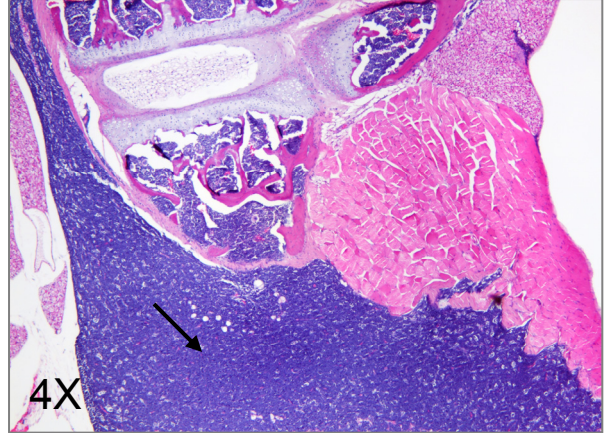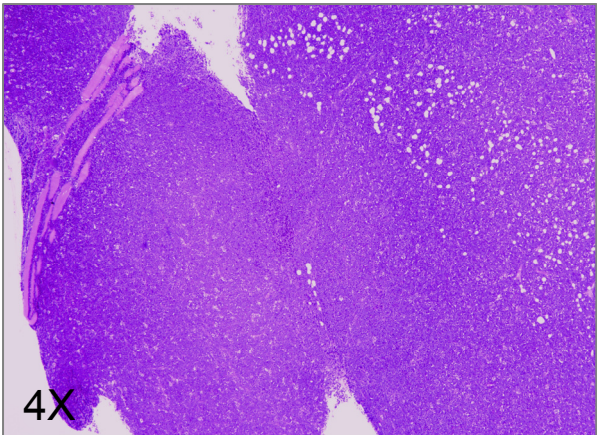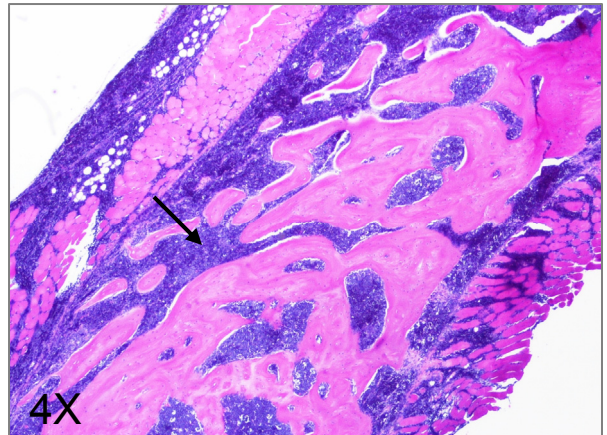

Nemajerova et al., Suppl. Figure 4

Tumor #73  
p73+/+ Eμ-myc

Out of 9 metaphases:

6 – tri(14);  
2 – tri(1), tri(14)  
1 – normal;

42XX tri(1), tri(14)

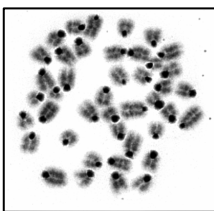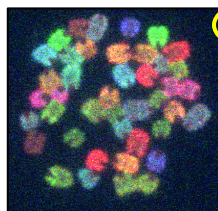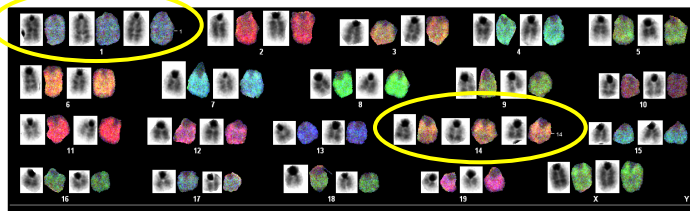

Tumor #378  
p73+/- Eμ-myc

Out of 9 metaphases:

7 – tri(6);  
1 – del(2), tri(6);  
1 – del(2), tri(6), tri(13), tri(14)

41XY tri(6)

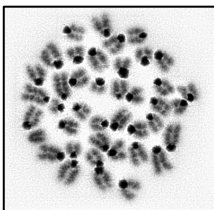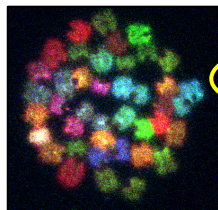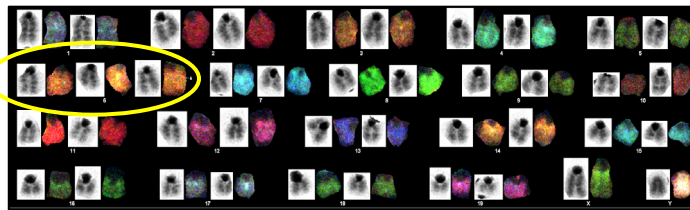

Tumor #378  
p73+/- Eμ-myc

42XY del(2), tri(6), tri(13), tri(19)

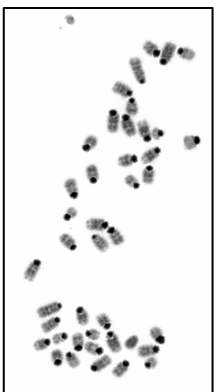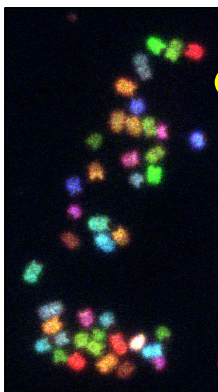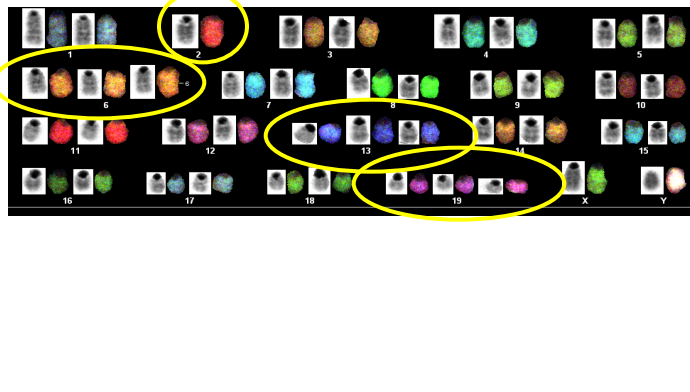

Tumor #164  
p73-/- Eμ-myc

Out of 24 metaphases:

22 – normal  
1 – tri(14)  
1 – tri(14); tri(15)

42XX

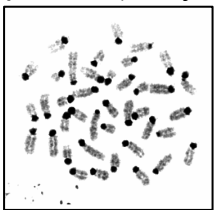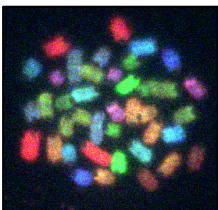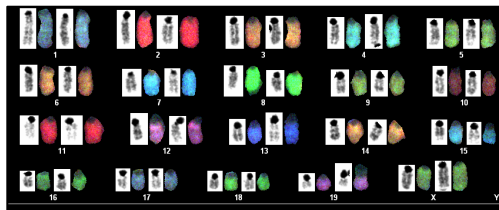



**A**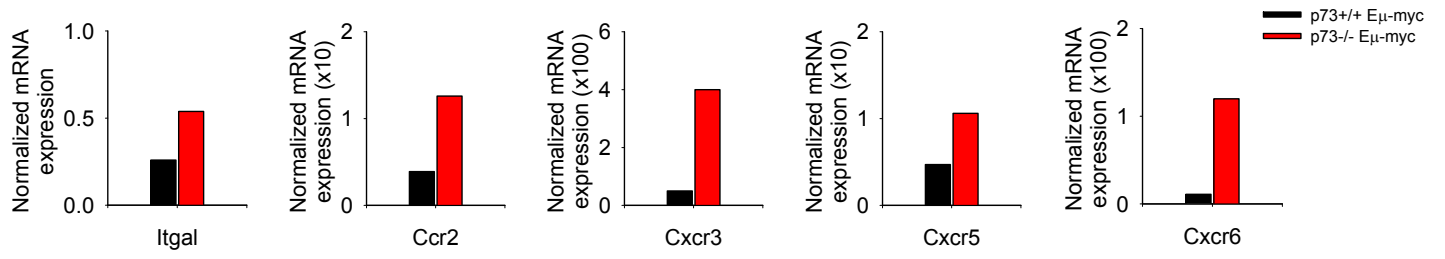**B**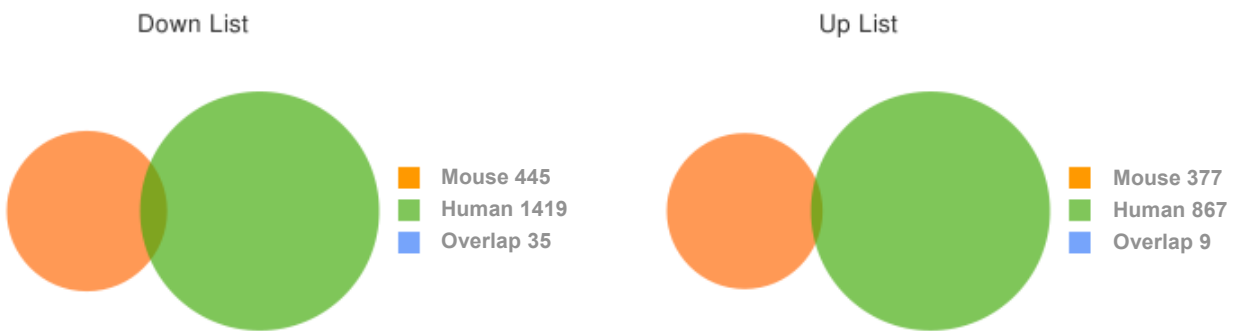

Supplement: JCI40331sd.pdf [file JCI40331sd.pdf]
